# Supplementary material
Source: publisher figshare collection journal article supplement (https://gsajournals.figshare.com/ndownloader/files/12554855)
Supplement: Supplementary file 1 [file 12554855]

## Sheet: Sheet3
Table S2 List of Commonly Deregulated Genes
FlyBase Gene ID	Gene Symbol	Salivary Gland	Wing Disc
FBgn0004168	5-HT1A
FBgn0000046	Act87E
FBgn0051865	Ada1-1
FBgn0051866	Ada1-2
FBgn0036752	Adgf-A					Downregulated in dCap-D3 mutants
FBgn0026602	Ady43A					Upregulated in dCap-D3 mutants
FBgn0052865	alphagamma-element:CR32865
FBgn0003886	alphaTub85E
FBgn0000075	amd
FBgn0035076	Ance-5
FBgn0050488	antr
FBgn0000121	Arr2
FBgn0039595	AstA-R2
FBgn0036789	AstC-R2
FBgn0032422	atilla
FBgn0012042	AttA
FBgn0041581	AttB
FBgn0041579	AttC
FBgn0038530	AttD
FBgn0024251	bbx
FBgn0010357	betaTry
FBgn0011206	bol
FBgn0010015	CanA1
FBgn0051989	Cap-D3
FBgn0000278	CecB
FBgn0000279	CecC
FBgn0035168	cep290
FBgn0037517	CG10086
FBgn0039084	CG10175
FBgn0038431	CG10405
FBgn0035670	CG10472
FBgn0039321	CG10550
FBgn0046302	CG10650
FBgn0033821	CG10799
FBgn0031178	CG10918
FBgn0037228	CG1092
FBgn0037304	CG1113
FBgn0031855	CG11221
FBgn0035546	CG11345
FBgn0035490	CG1136
FBgn0037181	CG11370
FBgn0035359	CG1143
FBgn0038068	CG11600
FBgn0036194	CG11652
FBgn0037562	CG11671
FBgn0034495	CG11788
FBgn0039299	CG11854
FBgn0039316	CG11893
FBgn0039656	CG11951
FBgn0030098	CG12057
FBgn0037386	CG1208
FBgn0037974	CG12224
FBgn0038665	CG12269
FBgn0033521	CG12896
FBgn0033502	CG12910
FBgn0033501	CG12911
FBgn0037078	CG12971
FBgn0037065	CG12974
FBgn0036652	CG13032
FBgn0036596	CG13045
FBgn0036606	CG13060
FBgn0040796	CG13064
FBgn0026565	CG1315
FBgn0033705	CG13168
FBgn0033789	CG13324
FBgn0036468	CG13461
FBgn0034788	CG13532
FBgn0034899	CG13560
FBgn0034996	CG13575
FBgn0265266	CG13639
FBgn0039237	CG13640
FBgn0031254	CG13692
FBgn0036717	CG13731
FBgn0040725	CG13946
FBgn0031277	CG13947
FBgn0031756	CG13992
FBgn0039592	CG14062
FBgn0036870	CG14095
FBgn0036935	CG14186
FBgn0039428	CG14237
FBgn0039482	CG14258
FBgn0032022	CG14275
FBgn0038629	CG14304
FBgn0034318	CG14500
FBgn0037836	CG14692
FBgn0038261	CG14856
FBgn0031157	CG1503
FBgn0029814	CG15765
FBgn0032495	CG16820
FBgn0028544	CG16884
FBgn0028938	CG16886
FBgn0036553	CG17027
FBgn0039051	CG17109
FBgn0039048	CG17111
FBgn0032304	CG17134
FBgn0036953	CG17145
FBgn0260393	CG17147
FBgn0031170	CG1718
FBgn0038761	CG17190
FBgn0032771	CG17349
FBgn0025837	CG17636
FBgn0033836	CG18278
FBgn0033683	CG18343
FBgn0033458	CG18446
FBgn0035642	CG18586
FBgn0036469	CG18649
FBgn0042104	CG18747
FBgn0042179	CG18869
FBgn0030377	CG1924
FBgn0033214	CG1941
FBgn0026563	CG1979
FBgn0033205	CG2064
FBgn0033204	CG2065
FBgn0050090	CG30090
FBgn0050098	CG30098
FBgn0043792	CG30427
FBgn0029608	CG3091
FBgn0051219	CG31219
FBgn0051321	CG31321
FBgn0051323	CG31323
FBgn0051380	CG31380
FBgn0051431	CG31431
FBgn0051528	CG31528
FBgn0051612	CG31612
FBgn0051664	CG31664
FBgn0051690	CG31690
FBgn0051792	CG31792
FBgn0052055	CG32055
FBgn0052195	CG32195
FBgn0052249	CG32249
FBgn0052436	CG32436
FBgn0052437	CG32437
FBgn0052440	CG32440
FBgn0052581	CG32581
FBgn0052633	CG32633
FBgn0052640	CG32640
FBgn0052793	CG32793
FBgn0053093	CG33093
FBgn0053127	CG33127
FBgn0053136	CG33136
FBgn0053301	CG33301
FBgn0053306	CG33306
FBgn0053346	CG33346
FBgn0035154	CG3344
FBgn0053489	CG33489
FBgn0053509	CG33509
FBgn0054026	CG34026
FBgn0054054	CG34054
FBgn0085227	CG34198
FBgn0085256	CG34227
FBgn0085261	CG34232
FBgn0085307	CG34278
FBgn0085320	CG34291
FBgn0085359	CG34330
FBgn0263829	CG34334
FBgn0085413	CG34384
FBgn0035999	CG3552
FBgn0025643	CG3588
FBgn0029648	CG3603
FBgn0034785	CG3649
FBgn0034755	CG3746
FBgn0036833	CG3819
FBgn0038837	CG3822
FBgn0036422	CG3868
FBgn0032143	CG4017
FBgn0069973	CG40485
FBgn0036648	CG4098
FBgn0259101	CG42249
FBgn0259219	CG42319
FBgn0259677	CG42346
FBgn0260758	CG42556
FBgn0260764	CG42562
FBgn0031389	CG4259
FBgn0261625	CG42708
FBgn0261633	CG42716
FBgn0262006	CG42824
FBgn0262023	CG42834
FBgn0262024	CG42835
FBgn0262794	CG43175
FBgn0263079	CG43338
FBgn0038795	CG4335
FBgn0263083	CG43351
FBgn0263216	CG43386
FBgn0263321	CG43402
FBgn0263400	CG43446
FBgn0263776	CG43693
FBgn0264488	CG43896
FBgn0264541	CG43920
FBgn0264746	CG44004
FBgn0264832	CG44040
FBgn0266446	CG45076
FBgn0038358	CG4525
FBgn0033820	CG4716
FBgn0035040	CG4741
FBgn0035043	CG4781
FBgn0037996	CG4830
FBgn0036620	CG4842
FBgn0034229	CG4847
FBgn0034139	CG4927
FBgn0036597	CG4962
FBgn0039356	CG5039
FBgn0032235	CG5096
FBgn0030828	CG5162
FBgn0031908	CG5177
FBgn0038485	CG5255
FBgn0038986	CG5278
FBgn0037902	CG5281
FBgn0039527	CG5639
FBgn0026593	CG5707
FBgn0034301	CG5756
FBgn0034292	CG5767
FBgn0034717	CG5819
FBgn0039490	CG5882
FBgn0038083	CG5999
FBgn0036750	CG6034
FBgn0036186	CG6071
FBgn0086254	CG6084
FBgn0030914	CG6106
FBgn0037807	CG6293
FBgn0034162	CG6426
FBgn0038917	CG6678
FBgn0036950	CG6996
FBgn0038972	CG7054
FBgn0036214	CG7264
FBgn0036949	CG7290
FBgn0035551	CG7465
FBgn0038523	CG7587
FBgn0040565	CG7606
FBgn0036145	CG7607
FBgn0038645	CG7714
FBgn0038646	CG7715
FBgn0028532	CG7968
FBgn0031004	CG7992
FBgn0033387	CG8008
FBgn0034140	CG8317
FBgn0031999	CG8419
FBgn0033917	CG8503
FBgn0033742	CG8550
FBgn0040837	CG8620
FBgn0030837	CG8661
FBgn0032945	CG8665
FBgn0038135	CG8773
FBgn0031531	CG8840
FBgn0033679	CG8888
FBgn0038466	CG8907
FBgn0034493	CG8908
FBgn0036394	CG9040
FBgn0031762	CG9098
FBgn0032879	CG9317
FBgn0030574	CG9413
FBgn0036876	CG9451
FBgn0030594	CG9509
FBgn0030593	CG9512
FBgn0030587	CG9522
FBgn0039756	CG9743
FBgn0038160	CG9759
FBgn0035282	CNMa
FBgn0264077	Cnx14D
FBgn0033600	Cpr47Ec
FBgn0035985	Cpr67B
FBgn0039480	Cpr97Ea
FBgn0039481	Cpr97Eb
FBgn0050029	CR30029
FBgn0053318	CR33318
FBgn0058469	CR40469
FBgn0085582	CR41257
FBgn0085789	CR41506
FBgn0085792	CR41509
FBgn0259112	CR42254
FBgn0262565	CR43105
FBgn0262722	CR43166
FBgn0262815	CR43186
FBgn0263507	CR43496
FBgn0263665	CR43656
FBgn0263870	CR43717
FBgn0264310	CR43785
FBgn0264437	CR43855
FBgn0264508	CR43907
FBgn0264548	CR43927
FBgn0264987	CR44138
FBgn0265375	CR44316
FBgn0265533	CR44383
FBgn0265577	CR44404
FBgn0265651	CR44458
FBgn0265843	CR44632
FBgn0265928	CR44717
FBgn0266002	CR44776
FBgn0266405	CR45045
FBgn0266689	CR45179
FBgn0267142	CR45582
FBgn0267185	CR45625
FBgn0267587	CR45925
FBgn0267665	CR46003
FBgn0267920	CR46201
FBgn0038681	Cyp12a4
FBgn0015035	Cyp4e3
FBgn0015037	Cyp4p1
FBgn0033395	Cyp4p2
FBgn0033302	Cyp6a14
FBgn0015714	Cyp6a17
FBgn0033978	Cyp6a23
FBgn0038194	Cyp6d5
FBgn0033659	Damm
FBgn0053516	dpr3
FBgn0004240	Dpt
FBgn0034407	DptB
FBgn0010388	Dro
FBgn0010381	Drs
FBgn0000451	ect
FBgn0052185	edin
FBgn0264490	Eip93F
FBgn0005660	Ets21C
FBgn0029769	frma
FBgn0037724	Fst
FBgn0001089	Gal
FBgn0031117	GstT3
FBgn0028430	He
FBgn0010114	hig
FBgn0029167	Hml
FBgn0035160	hng3
FBgn0053147	Hs3st-A
FBgn0013276	Hsp70Ab
FBgn0013277	Hsp70Ba
FBgn0013278	Hsp70Bb
FBgn0051354	Hsp70Bbb
FBgn0013279	Hsp70Bc
FBgn0034329	IM1
FBgn0040653	IM4
FBgn0030187	Ipod
FBgn0259683	Ir40a
FBgn0010395	Itgbn
FBgn0028424	JhI-26
FBgn0035667	Jon65Ai
FBgn0035665	Jon65Aiii
FBgn0250815	Jon65Aiv
FBgn0023197	Jon74E
FBgn0039778	Jon99Fi
FBgn0002578	Kaz-m1
FBgn0027259	Kmn1
FBgn0010482	l(2)01289
FBgn0010549	l(2)03659
FBgn0002531	Lcp1
FBgn0002533	Lcp2
FBgn0002534	Lcp3
FBgn0002535	Lcp4
FBgn0025578	Lcp9
FBgn0028583	lcs
FBgn0016650	Lgr1
FBgn0038035	lig3
FBgn0002023	Lim3
FBgn0033593	Listericin
FBgn0039848	lox
FBgn0004425	LysB
FBgn0004426	LysC
FBgn0004427	LysD
FBgn0004428	LysE
FBgn0004430	LysS
FBgn0002719	Men
FBgn0050021	metro
FBgn0038294	Mf
FBgn0038799	MFS9
FBgn0002772	Mlc1
FBgn0259209	Mlp60A
FBgn0002789	Mp20
FBgn0020269	mspo
FBgn0002862	Mst87F
FBgn0013672	mt:ATPase6
FBgn0013674	mt:CoI
FBgn0013675	mt:CoII
FBgn0013676	mt:CoIII
FBgn0013678	mt:Cyt-b
FBgn0013679	mt:ND1
FBgn0013680	mt:ND2
FBgn0262952	mt:ND4
FBgn0013685	mt:ND6
FBgn0014865	Mtk
FBgn0038790	MtnC
FBgn0265416	Neto
FBgn0037447	Neurochondrin
FBgn0002933	ng1
FBgn0010294	ng2
FBgn0031865	Nha1
FBgn0045980	niki
FBgn0028542	NimB4
FBgn0259896	NimC1
FBgn0011676	Nos
FBgn0038198	Npc2b
FBgn0029147	NtR
FBgn0259697	nvd
FBgn0030985	Obp18a
FBgn0036940	obst-J
FBgn0036474	Or71a
FBgn0032891	Oseg5
FBgn0037427	Osi17
FBgn0038516	P5cr-2
FBgn0262728	Pal2
FBgn0030310	PGRP-SA
FBgn0033327	PGRP-SC1b
FBgn0026190	PH4alphaMP
FBgn0039779	PH4alphaSG2
FBgn0263234	Phae1
FBgn0003086	Pig1
FBgn0038966	pinta
FBgn0053508	ppk13
FBgn0051105	ppk22
FBgn0261362	PPO1
FBgn0033367	PPO2
FBgn0003149	Prm
FBgn0029723	Proc-R
FBgn0033518	Prx2540-2
FBgn0020912	Ptx1
FBgn0011828	Pxn
FBgn0263974	qin
FBgn0028572	qtc
FBgn0031142	r-cup
FBgn0011829	Ret
FBgn0085426	Rgk3
FBgn0032013	Scgalpha
FBgn0020907	Scp2
FBgn0053497	Sdic2
FBgn0005564	Shal
FBgn0035915	S-Lap1
FBgn0052351	S-Lap2
FBgn0035968	Slc45-1
FBgn0003430	slp1
FBgn0004567	slp2
FBgn0086065	snoRNA:Me28S-G3113a
FBgn0063391	snoRNA:U14:30Eb
FBgn0083987	snRNA:U11
FBgn0051755	SoYb
FBgn0032638	SPH93
FBgn0039795	Spn100A
FBgn0044011	Spn43Ad
FBgn0036970	Spn77Bc
FBgn0259678	sqa
FBgn0014033	Sr-CI
FBgn0261041	stj
FBgn0028675	Sur
FBgn0038398	sxe2
FBgn0261090	Sytbeta
FBgn0046689	Takl1
FBgn0041183	Tep1
FBgn0011555	thetaTry
FBgn0004117	Tm2
FBgn0265356	tn
FBgn0003733	tor
FBgn0038838	TotB
FBgn0019650	toy
FBgn0034094	Tsf3
FBgn0026315	Ugt35a
FBgn0040262	Ugt36Ba
FBgn0040260	Ugt36Bc
FBgn0040251	Ugt86Di
FBgn0035756	unc-13-4A
FBgn0030904	upd2
FBgn0262526	vas
FBgn0038613	Vha100-4
FBgn0032373	Vha100-5
FBgn0033748	vis
FBgn0037750	Whamy
FBgn0004028	wupA
FBgn0040063	yip3
FBgn0040060	yip7
FBgn0035917	Zasp66
FBgn0036985	zye
Table S2. List of commonly deregulated genes between w1118 and dCap-D3c07081/c07081 mutant tissues
